# Supplementary material for: A retrospective study on the possible systematic inflammatory response markers to predict the prognosis of patients with bladder cancer undergoing radial cystectomy
Source: PubMed Central journal article supplement — Mol Clin Oncol. 2020 Aug 18;13(5):47. doi: 10.3892/mco.2020.2117 (PMC7453395; doi:10.3892/mco.2020.2117), 2020-08-18
Supplement: Supplementary_Data.pdf [file Supplementary_Data.pdf]

Table SI. Marker values in non-NAC and NAC groups.

| A, Non-NAC (n=76)          |      |      |      |       |       |          |
|----------------------------|------|------|------|-------|-------|----------|
| Marker                     | NLR  | MLR  | MLR  | LPR   | PNI   | De-Ritis |
| Median                     | 2.17 | 0.24 | 4.09 | 71.84 | 49.38 | 1.08     |
| Mean                       | 3.31 | 0.28 | 5.54 | 85.75 | 48.73 | 1.11     |
| SD                         | 3.23 | 0.16 | 8.54 | 64.09 | 7.58  | 0.41     |
| Median                     | 1.86 | 0.20 | 5.09 | 74.23 | 49.76 | 1.18     |
| B, NAC (n=31)              |      |      |      |       |       |          |
| Marker                     | NLR  | MLR  | MLR  | LPR   | PNI   | De-Ritis |
| Mean                       | 2.32 | 0.25 | 6.09 | 84.47 | 48.78 | 1.22     |
| SD                         | 2.42 | 0.18 | 5.20 | 45.57 | 7.00  | 0.42     |
| P-values (non-NAC vs. NAC) | 0.09 | 0.31 | 0.68 | 0.91  | 0.97  | 0.25     |

NAC, neoadjuvant chemotherapy; NLR, neutrophil-to-lymphocyte ratio; MLR, monocyte-to-lymphocyte ratio; LPR, lymphocyte-to-platelet ratio; PNI, prognostic nutritional index; SD, standard deviation.
